# Supplementary material
Source: PubMed Central journal article supplement (PMC2785564)
Supplement: supp_M109.049767_FigureS1.pdf [file supp_M109.049767_FigureS1.pdf]

A

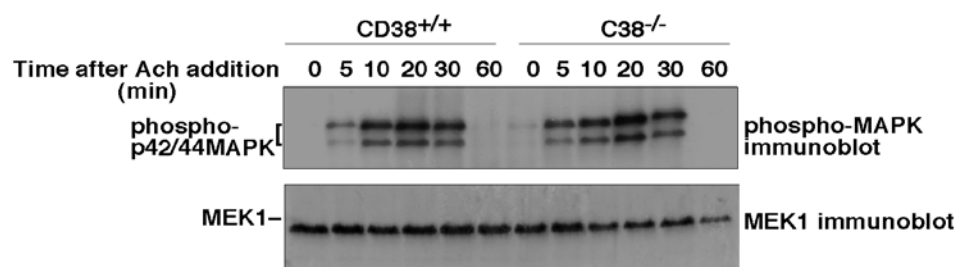

B

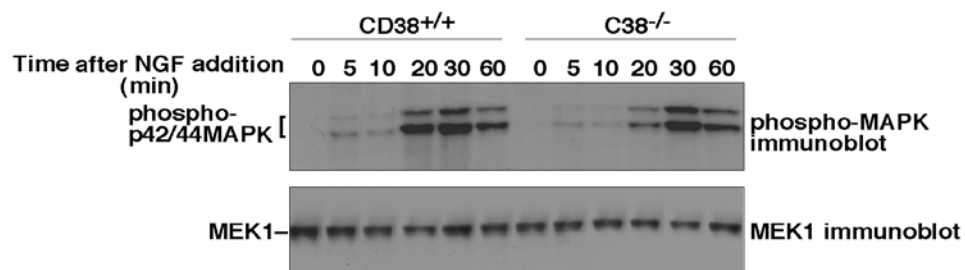

**Figure S1.** MAPK activation by ACh (50 mM) (A) and NGF (50 ng/ml) (B) in wildtype or CD38-knockdown PC12 cells. MEK1 expression was used as a loading control.
